# Supplementary material
Source: publisher site journal article supplement (https://www.dovepress.com/get_supplementary_file.php?f=228351.xlsx)
Supplement: Supplementary file 1 [file get_supplementary_file.php]

## Sheet: Sheet1
	Supplementary Table S1. The rat Oxidative Stress RT² Profiler PCR Array profiles the expression of 84 genes related to oxidative stress		Fold Change (comparing to control group)
			HG	APS-HG	siRNASOD2	APS-siRNASOD2
Position	symbol	Gene name	Fold Change	Fold Change	Fold Change	Fold Change
A01	Alb	Albumin	0.465649	1.10023	0.487838	1.84728
A02	Als2	Amyotrophic lateral sclerosis 2 (juvenile) homolog (human)	1.42794	0.558934	1.25262	1.01487
A03	Aox1	Aldehyde oxidase 1	1.57791	0.994798	1.59361	0.95251
A04	Apc	Adenomatous polyposis coli	0.998644	1.06413	0.641651	2.23568
A05	Apoe	Apolipoprotein E	1.4224	0.956699	1.33874	0.310446
A06	Cat	Catalase	0.3611	1.46086	0.459247	1.70922
A07	Ccl5	Chemokine (C-C motif) ligand 5	1.46216	0.730275	1.17878	0.880811
A08	Ccs	Copper chaperone for superoxide dismutase	1.22403	0.80458	1.24085	0.841255
A09	Ctsb	Cathepsin B	0.798428	1.24917	0.614114	9.03298
A10	Cyba	Cytochrome b-245, alpha polypeptide	4.95405	0.80254	2.5403	0.641223
A11	Cygb	Cytoglobin	1.11871	0.870568	1.22203	0.846103
A12	Dhcr24	24-dehydrocholesterol reductase	0.890493	1.2994	0.921357	1.2589
B01	Dnm2	Dynamin 2	1.21458	0.750504	1.19095	1.09079
B02	Duox1	Dual oxidase 1	1.4364	0.931907	1.184	0.838417
B03	Duox2	Dual oxidase 2	1.51236	0.257803	1.08721	0.762912
B04	Ehd2	EH-domain containing 2	0.688218	1.27359	0.918932	1.00604
B05	Epx	Eosinophil peroxidase	0.950385	0.876104	0.60454	1.56013
B06	Ercc2	Excision repair cross-complementing rodent repair deficiency, complementation group 2	1.48796	1.15717	1.0558	0.559101
B07	Ercc6	Excision repair cross-complementing rodent repair deficiency, complementation group 6	1.115	0.880448	3.23437	1.21096
B08	Fancc	Fanconi anemia, complementation group C	1.06468	0.929445	1.95561	0.579382
B09	Fmo2	Flavin containing monooxygenase 2	1.26658	0.418059	1.13817	0.440562
B10	Fth1	Ferritin, heavy polypeptide 1	1.80078	1.11721	2.24202	1.74627
B11	Gclc	Glutamate-cysteine ligase, catalytic subunit	1.18604	0.690532	1.08904	0.452351
B12	Gclm	Glutamate cysteine ligase, modifier subunit	1.41034	0.895859	1.57188	0.852692
C01	Gpx1	Glutathione peroxidase 1	0.338416	3.27652	0.271513	3.67487
C02	Gpx2	Glutathione peroxidase 2	0.845581	1.09496	0.553151	1.56256
C03	Gpx3	Glutathione peroxidase 3	0.795424	2.02955	0.457193	4.31218
C04	Gpx4	Glutathione peroxidase 4	1.94736	1.22957	1.05108	1.69834
C05	Gpx5	Glutathione peroxidase 5	12.6619	2.21455	1.55177	10.3835
C06	Gpx6	Glutathione peroxidase 6	1.97055	2.65328	1.02296	1.92927
C07	Gpx7	Glutathione peroxidase 7	0.737568	1.0684	0.244052	0.977604
C08	Gsr	Glutathione reductase	0.442559	1.15149	0.433599	1.14583
C09	Gstk1	Glutathione S-transferase kappa 1	0.525229	0.907177	0.561456	1.60031
C10	Gstp1	Glutathione S-transferase pi 1	0.902024	1.34451	0.414236	1.53527
C11	Hba1	Hemoglobin alpha, adult chain 2	1.75913	0.96324	1.17775	0.866925
C12	Hmox1	Heme oxygenase (decycling) 1	1.1732	0.832941	1.48052	0.850598
D01	Hspa1a	Heat shock 70kD protein 1A	1.92091	0.975229	1.03009	0.793856
D02	Idh1	Isocitrate dehydrogenase 1 (NADP+), soluble	1.53443	0.978965	0.71043	0.321191
D03	Ift172	Intraflagellar transport 172 homolog (Chlamydomonas)	3.61667	1.12425	1.27181	1.05155
D04	Krt1	Keratin 1	8.28038	0.628245	1.15337	7.56512
D05	LOC367198	Similar to Serine/threonine-protein kinase ATR (Ataxia telangiectasia and Rad3-related protein)	1.79308	0.871787	1.06052	1.63819
D06	Lpo	Lactoperoxidase	0.925359	1.26739	0.660907	1.82712
D07	Mb	Myoglobin	3.32823	0.873078	2.07676	1.03266
D08	Mpo	Myeloperoxidase	2.15646	1.08502	2.05995	0.854634
D09	Ncf1	Neutrophil cytosolic factor 1	3.07728	0.865888	3.58182	0.879307
D10	Ncf2	Neutrophil cytosolic factor 2	3.84182	0.799496	2.31633	0.463377
D11	Ngb	Neuroglobin	1.22	0.923347	1.16966	0.910412
D12	Nos2	Nitric oxide synthase 2, inducible	2.20381	0.92427	2.07777	0.745376
E01	Nox4	NADPH oxidase 4	3.60047	0.948128	3.07445	0.653487
E02	Noxa1	NADPH oxidase activator 1	1.05536	0.937551	1.04825	0.714813
E03	Noxo1	NADPH oxidase organizer 1	1.22824	0.97388	2.71319	0.734158
E04	Nqo1	NAD(P)H dehydrogenase, quinone 1	2.02769	0.78666	2.40703	0.997048
E05	Nudt1	Nudix (nucleoside diphosphate linked moiety X)-type motif 1	0.946453	0.462339	0.422027	2.15469
E06	Park7	Parkinson disease (autosomal recessive, early onset) 7	3.63634	1.17855	1.4862	1.06495
E07	Prdx1	Peroxiredoxin 1	0.554859	1.5612	0.351276	1.84506
E08	Prdx2	Peroxiredoxin 2	0.510609	1.95126	0.799946	0.36406
E09	Prdx3	Peroxiredoxin 3	0.264632	1.03398	0.0658162	0.777702
E10	Prdx4	Peroxiredoxin 4	0.735624	1.50488	0.79085	1.31371
E11	Prdx5	Peroxiredoxin 5	0.845338	0.932561	0.690868	0.837402
E12	Prdx6	Peroxiredoxin 6	0.969883	1.52486	0.724439	2.6151
F01	Prnp	Prion protein	7.11016	1.0765	1.5912	0.40237
F02	Psmb5	Proteasome (prosome, macropain) subunit, beta type 5	1.14736	0.665232	0.924436	2.04347
F03	Ptgs1	Prostaglandin-endoperoxide synthase 1	1.87154	0.849222	1.49814	0.851149
F04	Ptgs2	Prostaglandin-endoperoxide synthase 2	1.93636	0.999369	1.70903	0.802857
F05	Rag2	Recombination activating gene 2	1.3121	0.946095	1.04956	0.93003
F06	Scd1	Stearoyl-Coenzyme A desaturase 1	4.36263	1.37953	1.53791	0.76682
F07	Vimp	Selenoprotein S	0.650954	1.10431	0.413506	5.05666
F08	Sepp1	Selenoprotein P, plasma, 1	1.62752	1.12084	1.35752	0.846928
F09	Serpinb1b	Serine (or cysteine) peptidase inhibitor, clade B, member 1b	0.811035	1.09918	0.546627	1.49128
F10	Slc38a1	Solute carrier family 38, member 1	1.96593	1.03807	1.82485	0.88607
F11	Slc38a5	Solute carrier family 38, member 5	1.70934	1.1648	1.97673	1.92419
F12	Sod1	Superoxide dismutase 1, soluble	0.928757	1.01322	0.929897	0.943382
G01	Sod2	Superoxide dismutase 2, mitochondrial	0.410451	2.01382	0.299513	0.684499
G02	Sod3	Superoxide dismutase 3, extracellular	0.969867	1.07078	1.01138	1.09237
G03	Sqstm1	Sequestosome 1	1.60211	0.738013	1.18904	0.848525
G04	Srxn1	Sulfiredoxin 1 homolog (S. cerevisiae)	0.452819	1.34119	0.4915	1.145
G05	Tpo	Thyroid peroxidase	1.45871	0.898204	1.2961	0.563929
G06	Txn1	Thioredoxin 1	0.479016	1.04825	0.298835	0.998374
G07	Txnip	Thioredoxin interacting protein	2.91569	0.862378	2.2573	0.949738
G08	Txnrd1	Thioredoxin reductase 1	0.499554	1.54631	0.38717	1.95266
G09	Txnrd2	Thioredoxin reductase 2	0.419754	1.10004	0.482916	1.37563
G10	Ucp2	Uncoupling protein 2 (mitochondrial, proton carrier)	2.09246	3.13217	1.93453	2.98898
G11	Ucp3	Uncoupling protein 3 (mitochondrial, proton carrier)	1.35547	2.26875	1.50365	2.38666
G12	Vim	Vimentin	1.33367	0.582248	1.77495	0.981971
		Fold-Change :(2^(- Delta Delta Ct)) is the normalized gene expression (2^(- Delta Ct)) in the Test Sample divided the normalized gene expression (2^(- Delta Ct)) in the Control Sample. Fold-change values greater than one indicate an up-regulation, fold-change values less than one indicate a down-regulation.
